# Supplementary material for: Accurate energies for ππ* excited states via exchange scaling: the XS-CASSCF method
Source: Royal Society of Chemistry journal article supplement (doi:10.1039/d5sc09498d), 2026-05-13
Supplement: d5sc09498d1.pdf [file d5sc09498d1.pdf]

TABLE S1. Mean absolute error (MAE), mean error (ME) and root mean squared error (RMSE) for the ethene molecule, considering all states and considering only the singlet states.

| $\mu$ value                  | 0.0    | 0.1    | 0.4    | 0.7   | 1.0   |
|------------------------------|--------|--------|--------|-------|-------|
| MAE for all states           | 0.585  | 0.455  | 0.250  | 0.555 | 0.805 |
| MAE only for singlet states  | 0.810  | 0.560  | 0.160  | 0.790 | 1.330 |
| ME for all states            | -0.585 | -0.455 | -0.090 | 0.235 | 0.525 |
| ME only for singlet states   | -0.810 | -0.560 | 0.160  | 0.790 | 1.330 |
| RMSE for all states          | 0.627  | 0.467  | 0.266  | 0.603 | 0.961 |
| RMSE only for singlet states | 0.810  | 0.560  | 0.160  | 0.790 | 1.330 |

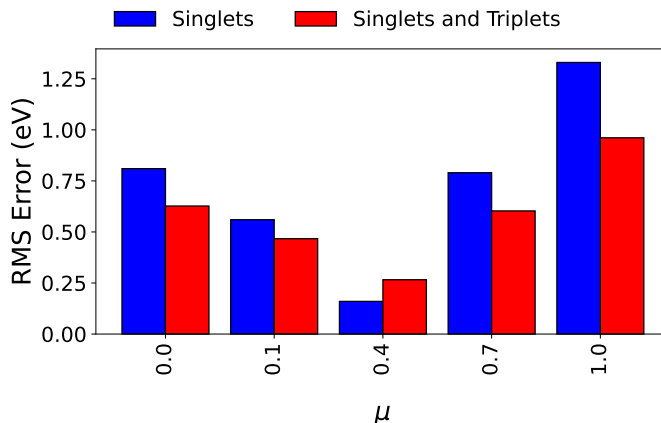

FIG. S3. Root mean squared error (RMSE) for the ethene molecule, considering all states and considering only the singlet states.

TABLE S2. Mean absolute error (MAE), mean error (ME) and root mean squared error (RMSE) for the acrolein molecule, considering all states and considering only the singlet states.

| $\mu$ value                  | 0.0   |       |       |       |       |       |       |       | 0.1   |       |       |       |       |
|------------------------------|-------|-------|-------|-------|-------|-------|-------|-------|-------|-------|-------|-------|-------|
| $\nu$ value                  | 0.0   | 0.4   | 0.5   | 0.6   | 0.7   | 0.8   | 0.9   | 1.0   | 0.5   | 0.6   | 0.7   | 0.8   | 0.9   |
| MAE for all states           | 0.760 | 0.753 | 0.753 | 0.758 | 0.758 | 0.760 | 0.763 | 0.768 | 0.707 | 0.708 | 0.712 | 0.713 | 0.717 |
| MAE only for singlet states  | 0.925 | 0.905 | 0.905 | 0.907 | 0.905 | 0.905 | 0.905 | 0.907 | 0.870 | 0.870 | 0.870 | 0.870 | 0.873 |
| ME for all states            | 0.330 | 0.370 | 0.380 | 0.392 | 0.402 | 0.413 | 0.427 | 0.438 | 0.363 | 0.372 | 0.385 | 0.397 | 0.407 |
| ME only for singlet states   | 0.280 | 0.330 | 0.345 | 0.357 | 0.370 | 0.385 | 0.400 | 0.412 | 0.355 | 0.365 | 0.380 | 0.395 | 0.407 |
| RMSE for all states          | 0.870 | 0.851 | 0.849 | 0.851 | 0.851 | 0.851 | 0.852 | 0.855 | 0.824 | 0.824 | 0.827 | 0.828 | 0.828 |
| RMSE only for singlet states | 1.017 | 0.989 | 0.986 | 0.987 | 0.986 | 0.985 | 0.983 | 0.985 | 0.970 | 0.969 | 0.971 | 0.970 | 0.971 |
| $\mu$ value                  | 0.4   |       |       |       | 0.7   |       |       |       | 1.0   |       |       |       |       |
| $\nu$ value                  | 0.0   | 0.4   | 0.7   | 1.0   | 0.0   | 0.4   | 0.7   | 1.0   | 1.0   |       |       |       |       |
| MAE for all states           | 0.587 | 0.585 | 0.590 | 0.602 | 0.527 | 0.523 | 0.527 | 0.532 | 0.533 |       |       |       |       |
| MAE only for singlet states  | 0.797 | 0.787 | 0.788 | 0.793 | 0.738 | 0.733 | 0.737 | 0.745 | 0.748 |       |       |       |       |
| ME for all states            | 0.280 | 0.322 | 0.350 | 0.385 | 0.277 | 0.317 | 0.343 | 0.375 | 0.387 |       |       |       |       |
| ME only for singlet states   | 0.337 | 0.392 | 0.427 | 0.467 | 0.417 | 0.467 | 0.502 | 0.540 | 0.633 |       |       |       |       |
| RMSE for all states          | 0.801 | 0.799 | 0.805 | 0.816 | 0.836 | 0.848 | 0.862 | 0.879 | 1.001 |       |       |       |       |
| RMSE only for singlet states | 0.971 | 0.967 | 0.973 | 0.984 | 1.021 | 1.036 | 1.054 | 1.074 | 1.222 |       |       |       |       |

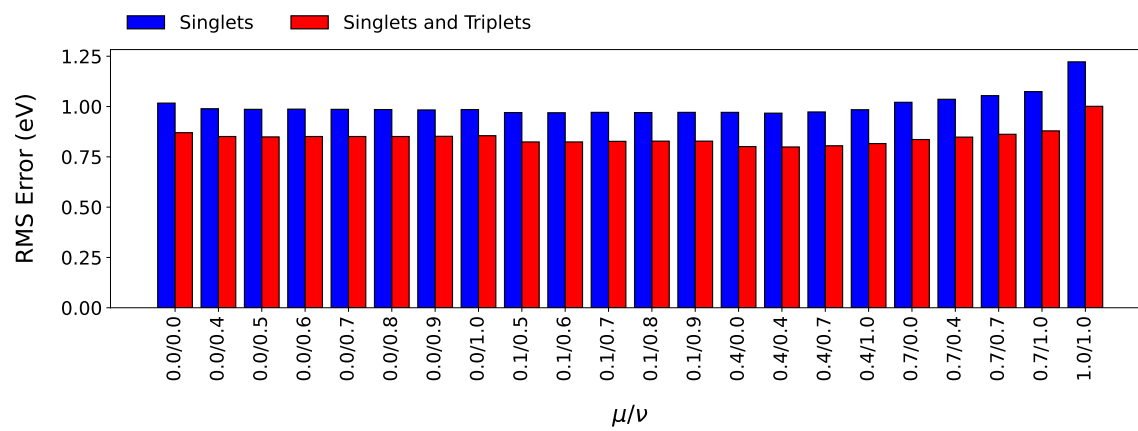

FIG. S4. Root mean squared error (RMSE) for the acrolein molecule, considering all states and considering only the singlet states.

TABLE S3. Mean absolute error (MAE), mean error (ME) and root mean squared error (RMSE) for the acrolein molecule, considering only  $3^1A'$  states for the state averaging.

| $\mu$ value | 0.0    |        |        |        |        |        |        |        | 0.1    |        |        |        |        |
|-------------|--------|--------|--------|--------|--------|--------|--------|--------|--------|--------|--------|--------|--------|
| $\nu$ value | 0.0    | 0.4    | 0.5    | 0.6    | 0.7    | 0.8    | 0.9    | 1.0    | 0.5    | 0.6    | 0.7    | 0.8    | 0.9    |
| MAE         | 0.520  | 0.470  | 0.480  | 0.480  | 0.475  | 0.475  | 0.470  | 0.475  | 0.510  | 0.510  | 0.515  | 0.515  | 0.515  |
| ME          | -0.520 | -0.430 | -0.420 | -0.410 | -0.405 | -0.395 | -0.390 | -0.385 | -0.280 | -0.270 | -0.265 | -0.255 | -0.245 |
| RMSE        | 0.701  | 0.637  | 0.638  | 0.631  | 0.624  | 0.618  | 0.611  | 0.611  | 0.582  | 0.577  | 0.579  | 0.575  | 0.570  |
| $\mu$ value | 0.4    |        |        |        | 0.7    |        |        |        | 1.0    |        |        |        |        |
| $\nu$ value | 0.0    | 0.4    | 0.7    | 1.0    | 0.0    | 0.4    | 0.7    | 1.0    | 1.0    |        |        |        |        |
| MAE         | 0.690  | 0.680  | 0.680  | 0.670  | 0.805  | 0.820  | 0.825  | 0.810  | 0.975  |        |        |        |        |
| ME          | 0.030  | 0.080  | 0.160  | 0.180  | 0.445  | 0.500  | 0.535  | 0.610  | 0.975  |        |        |        |        |
| RMSE        | 0.691  | 0.685  | 0.699  | 0.694  | 0.920  | 0.960  | 0.983  | 1.014  | 1.379  |        |        |        |        |

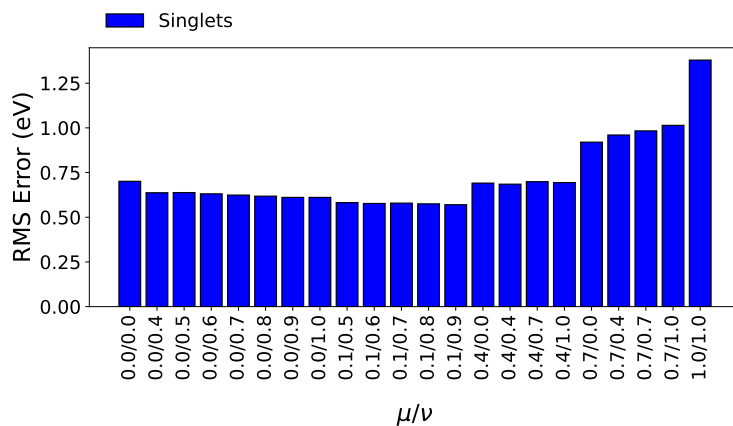

FIG. S5. Root mean squared error (RMSE) for the acrolein molecule, considering only  $3^1A$  states for the state averaging.

TABLE S4. Mean absolute error (MAE), mean error (ME) and root mean squared error (RMSE) for the butadiene molecule, considering all states and considering only the singlet states.

| $\mu$ value                  | 0.0    |        |        |        |        |        |        |        | 0.1    |        |        |        |        |
|------------------------------|--------|--------|--------|--------|--------|--------|--------|--------|--------|--------|--------|--------|--------|
| $\nu$ value                  | 0.0    | 0.4    | 0.5    | 0.6    | 0.7    | 0.8    | 0.9    | 1.0    | 0.5    | 0.6    | 0.7    | 0.8    | 0.9    |
| MAE for all states           | 0.305  | 0.268  | 0.260  | 0.255  | 0.253  | 0.250  | 0.247  | 0.247  | 0.245  | 0.247  | 0.247  | 0.247  | 0.250  |
| MAE only for singlet states  | 0.490  | 0.410  | 0.395  | 0.385  | 0.380  | 0.375  | 0.370  | 0.370  | 0.365  | 0.370  | 0.370  | 0.370  | 0.375  |
| ME for all states            | -0.305 | -0.268 | -0.260 | -0.255 | -0.253 | -0.250 | -0.247 | -0.247 | -0.185 | -0.177 | -0.172 | -0.172 | -0.170 |
| ME only for singlet states   | -0.490 | -0.410 | -0.395 | -0.385 | -0.380 | -0.375 | -0.370 | -0.370 | -0.245 | -0.230 | -0.220 | -0.220 | -0.215 |
| RMSE for all states          | 0.405  | 0.366  | 0.360  | 0.354  | 0.354  | 0.353  | 0.353  | 0.353  | 0.323  | 0.321  | 0.317  | 0.317  | 0.318  |
| RMSE only for singlet states | 0.559  | 0.502  | 0.493  | 0.485  | 0.484  | 0.483  | 0.483  | 0.483  | 0.440  | 0.436  | 0.430  | 0.430  | 0.432  |
| $\mu$ value                  | 0.4    |        |        |        | 0.7    |        |        |        | 1.0    |        |        |        |        |
| $\nu$ value                  | 0.0    | 0.4    | 0.7    | 1.0    | 0.0    | 0.4    | 0.7    | 1.0    | 1.0    |        |        |        |        |
| MAE for all states           | 0.338  | 0.350  | 0.355  | 0.357  | 0.448  | 0.455  | 0.458  | 0.460  | 0.635  |        |        |        |        |
| MAE only for singlet states  | 0.545  | 0.565  | 0.575  | 0.580  | 0.760  | 0.775  | 0.780  | 0.785  | 1.130  |        |        |        |        |
| ME for all states            | -0.002 | 0.035  | 0.050  | 0.057  | 0.218  | 0.255  | 0.272  | 0.280  | 0.495  |        |        |        |        |
| ME only for singlet states   | 0.125  | 0.205  | 0.235  | 0.250  | 0.570  | 0.645  | 0.680  | 0.695  | 1.130  |        |        |        |        |
| RMSE for all states          | 0.406  | 0.436  | 0.450  | 0.457  | 0.679  | 0.719  | 0.738  | 0.748  | 1.067  |        |        |        |        |
| RMSE only for singlet states | 0.559  | 0.601  | 0.621  | 0.632  | 0.950  | 1.008  | 1.035  | 1.048  | 1.502  |        |        |        |        |

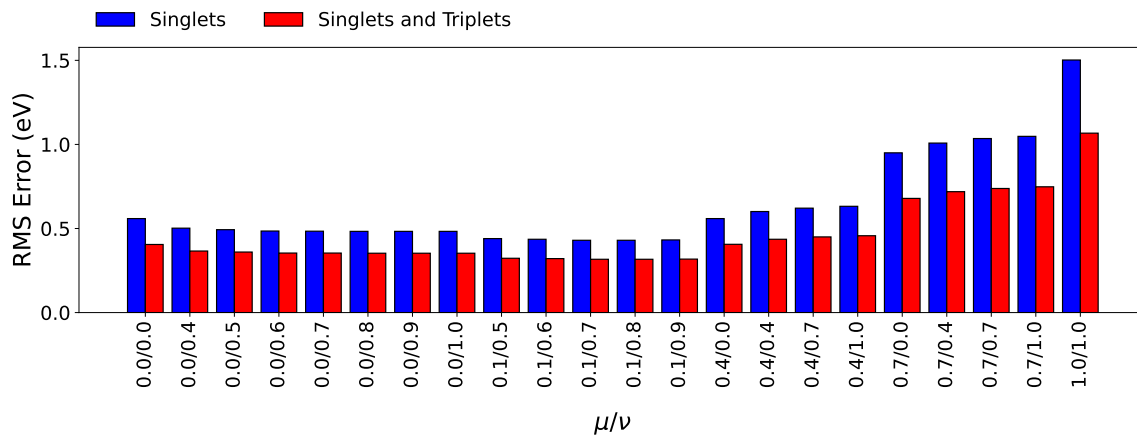

FIG. S6. Root mean squared error (RMSE) for the butadiene molecule, considering all states and considering only the singlet states.

TABLE S5. Mean absolute error (MAE), mean error (ME) and root mean squared error (RMSE) for the cyanoformaldehyde molecule, considering all states and considering only the singlet states.

| $\mu$ value                  | 0.0   |       |       |       |       |       |       |       | 0.1   |       |       |       |       |
|------------------------------|-------|-------|-------|-------|-------|-------|-------|-------|-------|-------|-------|-------|-------|
| $\nu$ value                  | 0.0   | 0.4   | 0.5   | 0.6   | 0.7   | 0.8   | 0.9   | 1.0   | 0.5   | 0.6   | 0.7   | 0.8   | 0.9   |
| MAE for all states           | 0.455 | 0.460 | 0.462 | 0.462 | 0.460 | 0.457 | 0.452 | 0.447 | 0.455 | 0.455 | 0.455 | 0.450 | 0.447 |
| MAE only for singlet states  | 0.800 | 0.815 | 0.815 | 0.815 | 0.810 | 0.805 | 0.795 | 0.785 | 0.800 | 0.800 | 0.800 | 0.790 | 0.785 |
| ME for all states            | 0.360 | 0.365 | 0.362 | 0.362 | 0.360 | 0.357 | 0.352 | 0.342 | 0.365 | 0.365 | 0.360 | 0.355 | 0.352 |
| ME only for singlet states   | 0.620 | 0.635 | 0.635 | 0.635 | 0.630 | 0.625 | 0.615 | 0.595 | 0.650 | 0.650 | 0.640 | 0.630 | 0.625 |
| RMSE for all states          | 0.723 | 0.737 | 0.737 | 0.737 | 0.733 | 0.728 | 0.718 | 0.704 | 0.735 | 0.735 | 0.731 | 0.721 | 0.716 |
| RMSE only for singlet states | 1.012 | 1.033 | 1.033 | 1.033 | 1.026 | 1.019 | 1.005 | 0.985 | 1.031 | 1.031 | 1.024 | 1.010 | 1.003 |

  

| $\mu$ value                  | 0.4   |       |       |       | 0.7   |       |       |       | 1.0   |
|------------------------------|-------|-------|-------|-------|-------|-------|-------|-------|-------|
| $\nu$ value                  | 0.0   | 0.4   | 0.7   | 1.0   | 0.0   | 0.4   | 0.7   | 1.0   | 1.0   |
| MAE for all states           | 0.432 | 0.438 | 0.438 | 0.422 | 0.415 | 0.425 | 0.420 | 0.410 | 0.412 |
| MAE only for singlet states  | 0.755 | 0.765 | 0.765 | 0.735 | 0.720 | 0.740 | 0.730 | 0.710 | 0.715 |
| ME for all states            | 0.362 | 0.367 | 0.362 | 0.347 | 0.365 | 0.370 | 0.365 | 0.350 | 0.353 |
| ME only for singlet states   | 0.665 | 0.685 | 0.675 | 0.645 | 0.700 | 0.720 | 0.710 | 0.680 | 0.715 |
| RMSE for all states          | 0.717 | 0.731 | 0.726 | 0.697 | 0.715 | 0.734 | 0.724 | 0.700 | 0.700 |
| RMSE only for singlet states | 1.006 | 1.027 | 1.020 | 0.978 | 1.004 | 1.032 | 1.018 | 0.983 | 0.983 |

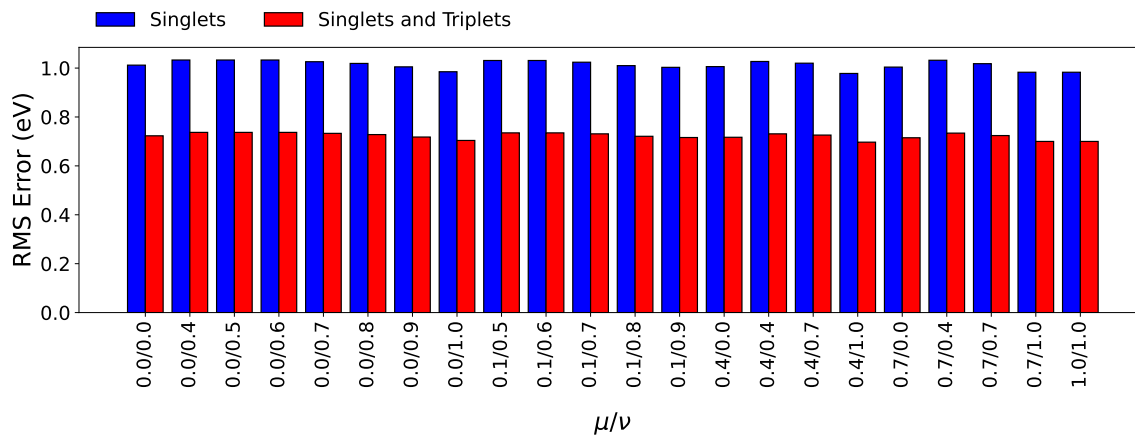

FIG. S7. Root mean squared error (RMSE) for the cyanoformaldehyde molecule, considering all states and considering only the singlet states.

TABLE S6. Mean absolute error (MAE), mean error (ME) and root mean squared error (RMSE) for the cyclopentadienone molecule, considering all states and considering only the singlet states.

| $\mu$ value                  | 0.0   |       |       |       |       |       |       |       | 0.1   |       |       |       |       |
|------------------------------|-------|-------|-------|-------|-------|-------|-------|-------|-------|-------|-------|-------|-------|
| $\nu$ value                  | 0.0   | 0.4   | 0.5   | 0.6   | 0.7   | 0.8   | 0.9   | 1.0   | 0.5   | 0.6   | 0.7   | 0.8   | 0.9   |
| MAE for all states           | 0.459 | 0.474 | 0.478 | 0.482 | 0.488 | 0.493 | 0.501 | 0.507 | 0.483 | 0.487 | 0.490 | 0.499 | 0.504 |
| MAE only for singlet states  | 0.522 | 0.550 | 0.556 | 0.562 | 0.572 | 0.582 | 0.594 | 0.604 | 0.578 | 0.586 | 0.592 | 0.602 | 0.612 |
| ME for all states            | 0.446 | 0.417 | 0.404 | 0.393 | 0.381 | 0.367 | 0.352 | 0.336 | 0.439 | 0.427 | 0.412 | 0.401 | 0.387 |
| ME only for singlet states   | 0.498 | 0.446 | 0.424 | 0.402 | 0.380 | 0.354 | 0.326 | 0.296 | 0.498 | 0.478 | 0.452 | 0.426 | 0.400 |
| RMSE for all states          | 0.567 | 0.563 | 0.562 | 0.562 | 0.564 | 0.567 | 0.572 | 0.578 | 0.597 | 0.594 | 0.591 | 0.592 | 0.592 |
| RMSE only for singlet states | 0.643 | 0.637 | 0.635 | 0.634 | 0.637 | 0.641 | 0.648 | 0.658 | 0.696 | 0.693 | 0.688 | 0.687 | 0.687 |
| $\mu$ value                  | 0.4   |       |       |       | 0.7   |       |       |       | 1.0   |       |       |       |       |
| $\nu$ value                  | 0.0   | 0.4   | 0.7   | 1.0   | 0.0   | 0.4   | 0.7   | 1.0   | 1.0   |       |       |       |       |
| MAE for all states           | 0.584 | 0.551 | 0.516 | 0.528 | 0.677 | 0.643 | 0.611 | 0.568 | 0.656 |       |       |       |       |
| MAE only for singlet states  | 0.776 | 0.720 | 0.656 | 0.678 | 0.958 | 0.902 | 0.844 | 0.764 | 0.938 |       |       |       |       |
| ME for all states            | 0.580 | 0.547 | 0.509 | 0.466 | 0.663 | 0.628 | 0.596 | 0.552 | 0.631 |       |       |       |       |
| ME only for singlet states   | 0.776 | 0.720 | 0.656 | 0.574 | 0.958 | 0.902 | 0.844 | 0.764 | 0.938 |       |       |       |       |
| RMSE for all states          | 0.761 | 0.737 | 0.712 | 0.688 | 0.920 | 0.891 | 0.860 | 0.820 | 0.961 |       |       |       |       |
| RMSE only for singlet states | 0.950 | 0.917 | 0.882 | 0.845 | 1.185 | 1.145 | 1.103 | 1.046 | 1.249 |       |       |       |       |

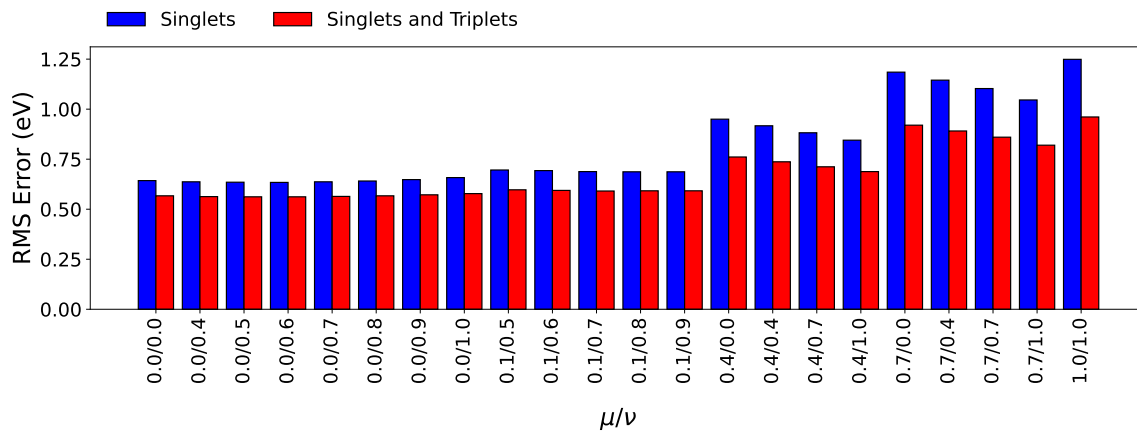

FIG. S8. Root mean squared error (RMSE) for the cyclopentadienone molecule, considering all states and considering only the singlet states.

TABLE S7. Mean absolute error (MAE), mean error (ME) and root mean squared error (RMSE) for the hexatriene molecule, considering all states and considering only the singlet states.

| $\mu$ value                  | 0.0    |        |        |        |        |        |        |        | 0.1   |       |       |        |        |
|------------------------------|--------|--------|--------|--------|--------|--------|--------|--------|-------|-------|-------|--------|--------|
| $\nu$ value                  | 0.0    | 0.4    | 0.5    | 0.6    | 0.7    | 0.8    | 0.9    | 1.0    | 0.5   | 0.6   | 0.7   | 0.8    | 0.9    |
| MAE for all states           | 0.025  | 0.110  | 0.133  | 0.160  | 0.180  | 0.200  | 0.217  | 0.245  | 0.165 | 0.185 | 0.210 | 0.230  | 0.248  |
| MAE only for singlet states  | 0.025  | 0.200  | 0.250  | 0.300  | 0.345  | 0.385  | 0.425  | 0.470  | 0.310 | 0.355 | 0.400 | 0.445  | 0.480  |
| ME for all states            | -0.025 | -0.015 | -0.023 | -0.035 | -0.050 | -0.070 | -0.098 | -0.125 | 0.040 | 0.025 | 0.010 | -0.010 | -0.038 |
| ME only for singlet states   | -0.025 | -0.010 | -0.030 | -0.060 | -0.095 | -0.145 | -0.205 | -0.270 | 0.100 | 0.065 | 0.030 | -0.015 | -0.080 |
| RMSE for all states          | 0.029  | 0.143  | 0.179  | 0.217  | 0.253  | 0.291  | 0.334  | 0.384  | 0.231 | 0.256 | 0.284 | 0.315  | 0.344  |
| RMSE only for singlet states | 0.029  | 0.200  | 0.252  | 0.306  | 0.358  | 0.411  | 0.472  | 0.542  | 0.326 | 0.361 | 0.401 | 0.445  | 0.487  |

  

| $\mu$ value                  | 0.4   |       |       |       | 0.7   |       |       |       | 1.0   |
|------------------------------|-------|-------|-------|-------|-------|-------|-------|-------|-------|
| $\nu$ value                  | 0.0   | 0.4   | 0.7   | 1.0   | 0.0   | 0.4   | 0.7   | 1.0   | 1.0   |
| MAE for all states           | 0.245 | 0.258 | 0.300 | 0.353 | 0.422 | 0.438 | 0.405 | 0.443 | 0.532 |
| MAE only for singlet states  | 0.450 | 0.480 | 0.575 | 0.690 | 0.795 | 0.830 | 0.770 | 0.865 | 1.035 |
| ME for all states            | 0.205 | 0.223 | 0.190 | 0.118 | 0.372 | 0.392 | 0.365 | 0.297 | 0.477 |
| ME only for singlet states   | 0.450 | 0.480 | 0.405 | 0.240 | 0.795 | 0.830 | 0.770 | 0.615 | 0.985 |
| RMSE for all states          | 0.356 | 0.461 | 0.498 | 0.517 | 0.632 | 0.733 | 0.761 | 0.751 | 1.011 |
| RMSE only for singlet states | 0.501 | 0.651 | 0.703 | 0.731 | 0.892 | 1.036 | 1.075 | 1.061 | 1.429 |

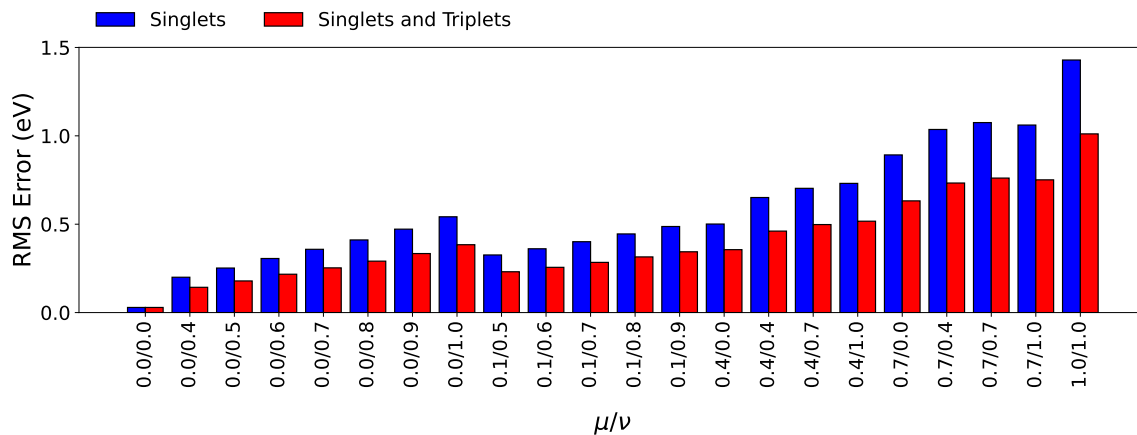

FIG. S9. Root mean squared error (RMSE) for the hexatriene molecule, considering all states and considering only the singlet states.

TABLE S8. Mean absolute error (MAE), mean error (ME) and root mean squared error (RMSE) for the naphthalene molecule, considering all states and considering only the singlet states.

| $\mu$ value                  | 0.0   |       |       |       |       |       |        |        | 0.1   |       |       |       |        |
|------------------------------|-------|-------|-------|-------|-------|-------|--------|--------|-------|-------|-------|-------|--------|
| $\nu$ value                  | 0.0   | 0.4   | 0.5   | 0.6   | 0.7   | 0.8   | 0.9    | 1.0    | 0.5   | 0.6   | 0.7   | 0.8   | 0.9    |
| MAE for all states           | 0.470 | 0.343 | 0.290 | 0.305 | 0.323 | 0.345 | 0.362  | 0.397  | 0.343 | 0.312 | 0.330 | 0.350 | 0.372  |
| MAE only for singlet states  | 0.815 | 0.560 | 0.455 | 0.490 | 0.525 | 0.565 | 0.600  | 0.645  | 0.560 | 0.500 | 0.540 | 0.580 | 0.620  |
| ME for all states            | 0.400 | 0.272 | 0.220 | 0.165 | 0.098 | 0.025 | -0.057 | -0.143 | 0.273 | 0.212 | 0.150 | 0.075 | -0.008 |
| ME only for singlet states   | 0.815 | 0.560 | 0.455 | 0.340 | 0.205 | 0.055 | -0.110 | -0.285 | 0.560 | 0.440 | 0.310 | 0.160 | -0.010 |
| RMSE for all states          | 0.601 | 0.495 | 0.459 | 0.430 | 0.408 | 0.411 | 0.440  | 0.510  | 0.520 | 0.479 | 0.448 | 0.434 | 0.447  |
| RMSE only for singlet states | 0.840 | 0.688 | 0.636 | 0.596 | 0.564 | 0.568 | 0.610  | 0.705  | 0.725 | 0.666 | 0.623 | 0.602 | 0.620  |
| $\mu$ value                  | 0.4   |       |       |       | 0.7   |       |        |        | 1.0   |       |       |       |        |
| $\nu$ value                  | 0.0   | 0.4   | 0.7   | 1.0   | 0.0   | 0.4   | 0.7    | 1.0    | 1.0   |       |       |       |        |
| MAE for all states           | 0.662 | 0.535 | 0.363 | 0.422 | 0.805 | 0.682 | 0.508  | 0.442  | 1.110 |       |       |       |        |
| MAE only for singlet states  | 1.200 | 0.950 | 0.600 | 0.700 | 1.485 | 1.240 | 0.895  | 0.740  | 1.110 |       |       |       |        |
| ME for all states            | 0.588 | 0.465 | 0.292 | 0.062 | 0.730 | 0.608 | 0.438  | 0.207  | 0.638 |       |       |       |        |
| ME only for singlet states   | 1.200 | 0.950 | 0.600 | 0.130 | 1.485 | 1.240 | 0.895  | 0.430  | 1.077 |       |       |       |        |
| RMSE for all states          | 0.873 | 0.751 | 0.597 | 0.514 | 1.076 | 0.950 | 0.777  | 0.614  | 0.762 |       |       |       |        |
| RMSE only for singlet states | 1.228 | 1.056 | 0.835 | 0.712 | 1.516 | 1.337 | 1.092  | 0.856  | 1.068 |       |       |       |        |

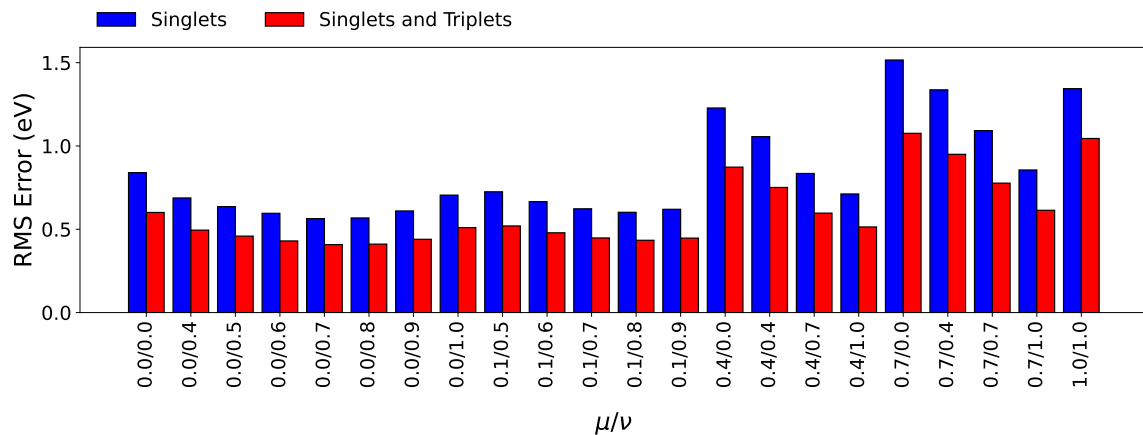

FIG. S10. Root mean squared error (RMSE) for the naphthalene molecule, considering all states and considering only the singlet states.

TABLE S9. Mean absolute error (MAE), mean error (ME) and root mean squared error (RMSE) for the octatetraene molecule, considering all states and considering only the singlet states.

| $\mu$ value                  | 0.0   |       |       |       |       |       |        |        | 0.1   |       |       |       |       |
|------------------------------|-------|-------|-------|-------|-------|-------|--------|--------|-------|-------|-------|-------|-------|
| $\nu$ value                  | 0.0   | 0.4   | 0.5   | 0.6   | 0.7   | 0.8   | 0.9    | 1.0    | 0.5   | 0.6   | 0.7   | 0.8   | 0.9   |
| MAE for all states           | 0.098 | 0.188 | 0.205 | 0.223 | 0.238 | 0.255 | 0.268  | 0.285  | 0.230 | 0.245 | 0.263 | 0.275 | 0.290 |
| MAE only for singlet states  | 0.175 | 0.345 | 0.380 | 0.410 | 0.435 | 0.460 | 0.480  | 0.505  | 0.430 | 0.460 | 0.485 | 0.510 | 0.530 |
| ME for all states            | 0.018 | 0.057 | 0.055 | 0.052 | 0.042 | 0.030 | 0.013  | -0.010 | 0.105 | 0.100 | 0.092 | 0.080 | 0.060 |
| ME only for singlet states   | 0.015 | 0.085 | 0.080 | 0.070 | 0.045 | 0.010 | -0.030 | -0.085 | 0.180 | 0.170 | 0.145 | 0.120 | 0.070 |
| RMSE for all states          | 0.125 | 0.252 | 0.275 | 0.295 | 0.311 | 0.327 | 0.342  | 0.365  | 0.330 | 0.347 | 0.359 | 0.372 | 0.380 |
| RMSE only for singlet states | 0.176 | 0.355 | 0.388 | 0.416 | 0.437 | 0.460 | 0.481  | 0.512  | 0.466 | 0.490 | 0.506 | 0.524 | 0.535 |

  

| $\mu$ value                  | 0.4   |       |       |       | 0.7   |       |       |       | 1.0   |
|------------------------------|-------|-------|-------|-------|-------|-------|-------|-------|-------|
| $\nu$ value                  | 0.0   | 0.4   | 0.7   | 1.0   | 0.0   | 0.4   | 0.7   | 1.0   | 1.0   |
| MAE for all states           | 0.213 | 0.280 | 0.330 | 0.370 | 0.357 | 0.400 | 0.403 | 0.440 | 0.507 |
| MAE only for singlet states  | 0.415 | 0.550 | 0.640 | 0.700 | 0.705 | 0.785 | 0.795 | 0.855 | 1.005 |
| ME for all states            | 0.208 | 0.250 | 0.235 | 0.185 | 0.347 | 0.390 | 0.383 | 0.330 | 0.472 |
| ME only for singlet states   | 0.415 | 0.490 | 0.450 | 0.330 | 0.705 | 0.785 | 0.755 | 0.635 | 0.935 |
| RMSE for all states          | 0.396 | 0.521 | 0.553 | 0.548 | 0.626 | 0.746 | 0.775 | 0.753 | 0.971 |
| RMSE only for singlet states | 0.559 | 0.737 | 0.782 | 0.774 | 0.885 | 1.055 | 1.096 | 1.065 | 1.373 |

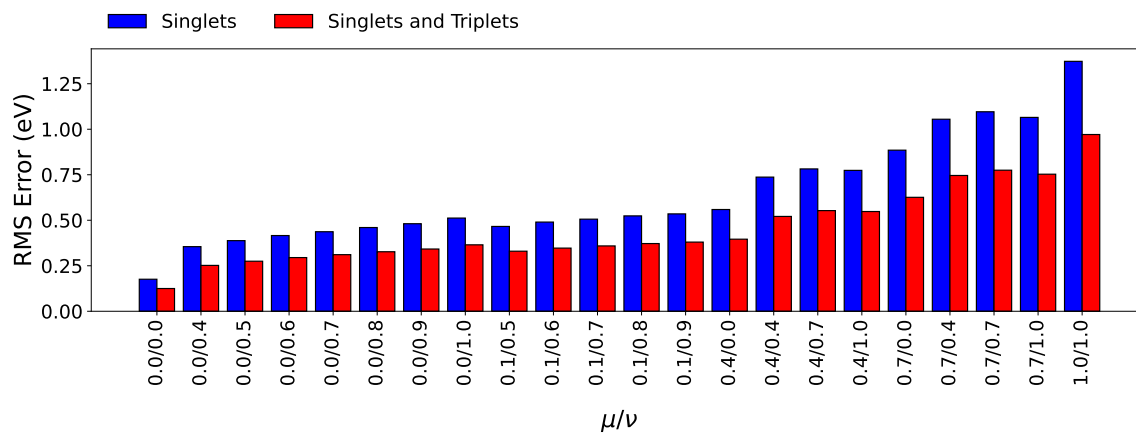

FIG. S11. Root mean squared error (RMSE) for the octatetraene molecule, considering all states and considering only the singlet states.

TABLE S10. Mean absolute error (MAE), mean error (ME) and root mean squared error (RMSE) for the pyridine molecule, considering all states and considering only the singlet states.

| $\mu$ value                  | 0.0   |       |       |       |       |       |        |        | 0.1   |       |       |       |       |
|------------------------------|-------|-------|-------|-------|-------|-------|--------|--------|-------|-------|-------|-------|-------|
| $\nu$ value                  | 0.0   | 0.4   | 0.5   | 0.6   | 0.7   | 0.8   | 0.9    | 1.0    | 0.5   | 0.6   | 0.7   | 0.8   | 0.9   |
| MAE for all states           | 0.484 | 0.436 | 0.456 | 0.474 | 0.494 | 0.514 | 0.532  | 0.586  | 0.470 | 0.490 | 0.514 | 0.530 | 0.550 |
| MAE only for singlet states  | 0.530 | 0.468 | 0.492 | 0.518 | 0.542 | 0.568 | 0.590  | 0.657  | 0.508 | 0.535 | 0.565 | 0.585 | 0.610 |
| ME for all states            | 0.364 | 0.256 | 0.212 | 0.166 | 0.110 | 0.046 | -0.024 | -0.098 | 0.270 | 0.222 | 0.170 | 0.106 | 0.038 |
| ME only for singlet states   | 0.530 | 0.397 | 0.343 | 0.283 | 0.212 | 0.133 | 0.045  | -0.048 | 0.417 | 0.355 | 0.290 | 0.210 | 0.125 |
| RMSE for all states          | 0.566 | 0.543 | 0.545 | 0.554 | 0.581 | 0.626 | 0.685  | 0.762  | 0.565 | 0.567 | 0.584 | 0.609 | 0.658 |
| RMSE only for singlet states | 0.615 | 0.587 | 0.589 | 0.601 | 0.632 | 0.684 | 0.751  | 0.839  | 0.611 | 0.614 | 0.634 | 0.663 | 0.719 |

  

| $\mu$ value                  | 0.4   |       |       |       | 0.7   |       |       |       | 1.0   |
|------------------------------|-------|-------|-------|-------|-------|-------|-------|-------|-------|
| $\nu$ value                  | 0.0   | 0.4   | 0.7   | 1.0   | 0.0   | 0.4   | 0.7   | 1.0   | 1.0   |
| MAE for all states           | 0.702 | 0.608 | 0.558 | 0.620 | 0.842 | 0.762 | 0.656 | 0.670 | 0.714 |
| MAE only for singlet states  | 0.792 | 0.675 | 0.613 | 0.690 | 0.963 | 0.860 | 0.728 | 0.748 | 0.798 |
| ME for all states            | 0.566 | 0.472 | 0.342 | 0.148 | 0.698 | 0.614 | 0.508 | 0.334 | 0.514 |
| ME only for singlet states   | 0.792 | 0.675 | 0.512 | 0.270 | 0.963 | 0.860 | 0.728 | 0.508 | 0.738 |
| RMSE for all states          | 0.780 | 0.710 | 0.656 | 0.677 | 0.943 | 0.867 | 0.802 | 0.744 | 0.888 |
| RMSE only for singlet states | 0.855 | 0.775 | 0.713 | 0.737 | 1.039 | 0.951 | 0.877 | 0.812 | 0.974 |

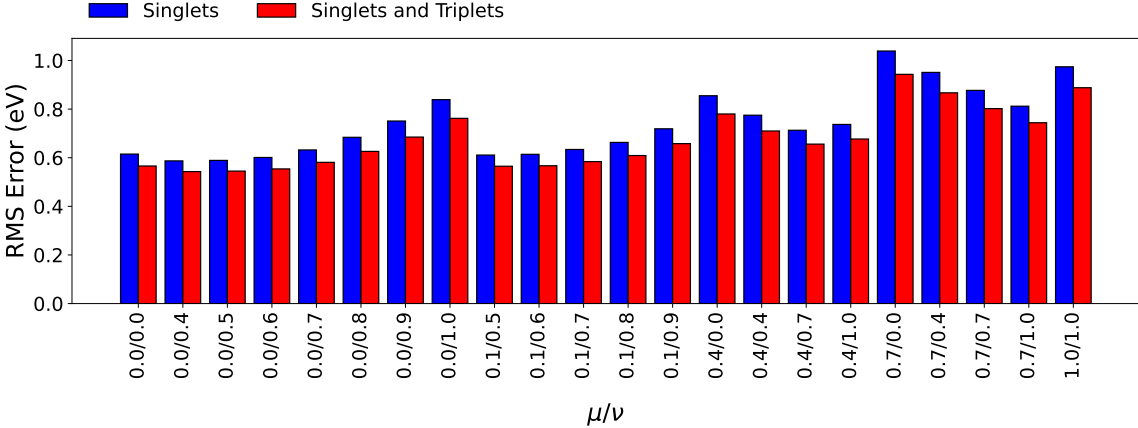

FIG. S12. Root mean squared error (RMSE) for the pyridine molecule, considering all states and considering only the singlet states.

TABLE S11. Mean absolute error (MAE), mean error (ME) and root mean squared error (RMSE) for the pyrimidine molecule, considering all states and considering only the singlet states.

| $\mu$ value                  | 0.0   |       |       |       |       |       |       |       | 0.1   |       |       |       |       |
|------------------------------|-------|-------|-------|-------|-------|-------|-------|-------|-------|-------|-------|-------|-------|
| $\nu$ value                  | 0.0   | 0.4   | 0.5   | 0.6   | 0.7   | 0.8   | 0.9   | 1.0   | 0.5   | 0.6   | 0.7   | 0.8   | 0.9   |
| MAE for all states           | 0.660 | 0.631 | 0.651 | 0.673 | 0.689 | 0.697 | 0.701 | 0.697 | 0.661 | 0.680 | 0.693 | 0.706 | 0.710 |
| MAE only for singlet states  | 0.713 | 0.677 | 0.700 | 0.725 | 0.743 | 0.753 | 0.758 | 0.753 | 0.710 | 0.732 | 0.747 | 0.762 | 0.767 |
| ME for all states            | 0.563 | 0.491 | 0.454 | 0.413 | 0.363 | 0.303 | 0.230 | 0.149 | 0.499 | 0.457 | 0.404 | 0.346 | 0.276 |
| ME only for singlet states   | 0.713 | 0.633 | 0.590 | 0.542 | 0.483 | 0.413 | 0.328 | 0.233 | 0.643 | 0.595 | 0.533 | 0.465 | 0.383 |
| RMSE for all states          | 0.716 | 0.716 | 0.716 | 0.724 | 0.737 | 0.755 | 0.785 | 0.824 | 0.728 | 0.727 | 0.730 | 0.745 | 0.765 |
| RMSE only for singlet states | 0.760 | 0.759 | 0.759 | 0.769 | 0.782 | 0.802 | 0.835 | 0.878 | 0.772 | 0.771 | 0.774 | 0.790 | 0.813 |
| $\mu$ value                  | 0.4   |       |       |       | 0.7   |       |       |       | 1.0   |       |       |       |       |
| $\nu$ value                  | 0.0   | 0.4   | 0.7   | 1.0   | 0.0   | 0.4   | 0.7   | 1.0   | 1.0   |       |       |       |       |
| MAE for all states           | 0.827 | 0.767 | 0.714 | 0.731 | 0.949 | 0.891 | 0.779 | 0.754 | 0.773 |       |       |       |       |
| MAE only for singlet states  | 0.902 | 0.830 | 0.768 | 0.788 | 1.040 | 0.972 | 0.838 | 0.810 | 0.828 |       |       |       |       |
| ME for all states            | 0.719 | 0.656 | 0.534 | 0.334 | 0.834 | 0.774 | 0.659 | 0.466 | 0.596 |       |       |       |       |
| ME only for singlet states   | 0.902 | 0.830 | 0.688 | 0.455 | 1.040 | 0.972 | 0.838 | 0.613 | 0.768 |       |       |       |       |
| RMSE for all states          | 0.854 | 0.808 | 0.763 | 0.758 | 0.989 | 0.919 | 0.846 | 0.783 | 0.858 |       |       |       |       |
| RMSE only for singlet states | 0.909 | 0.858 | 0.809 | 0.803 | 1.055 | 0.978 | 0.898 | 0.828 | 0.909 |       |       |       |       |

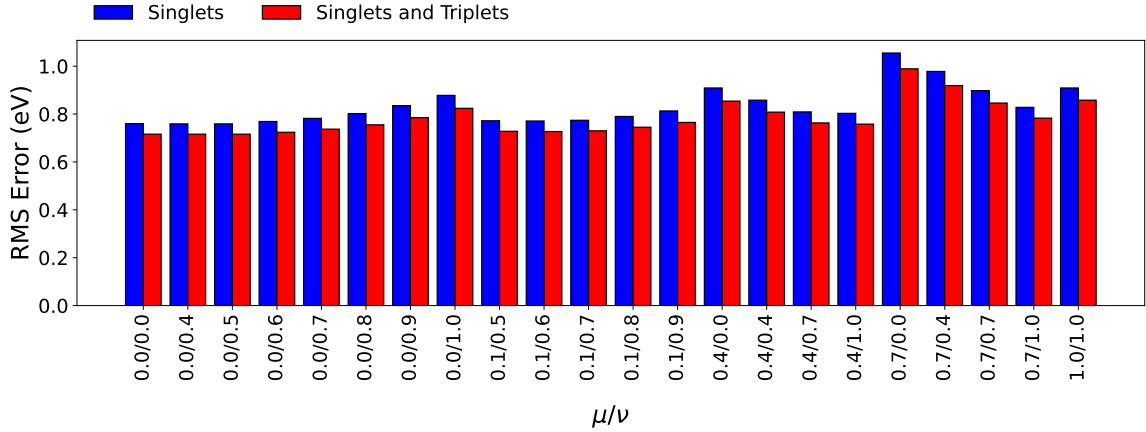

FIG. S13. Root mean squared error (RMSE) for the pyrimidine molecule, considering all states and considering only the singlet states.

TABLE S12. Mean absolute error (MAE), mean error (ME) and root mean squared error (RMSE) for the triazine molecule, considering all states and considering only the singlet states.

| $\mu$ value                  | 0.0   |       |       |       |       |        |        |        | 0.1   |       |       |       |        |
|------------------------------|-------|-------|-------|-------|-------|--------|--------|--------|-------|-------|-------|-------|--------|
| $\nu$ value                  | 0.0   | 0.4   | 0.5   | 0.6   | 0.7   | 0.8    | 0.9    | 1.0    | 0.5   | 0.6   | 0.7   | 0.8   | 0.9    |
| MAE for all states           | 0.616 | 0.526 | 0.556 | 0.566 | 0.582 | 0.600  | 0.618  | 0.658  | 0.568 | 0.588 | 0.596 | 0.612 | 0.628  |
| MAE only for singlet states  | 0.655 | 0.542 | 0.580 | 0.590 | 0.610 | 0.630  | 0.652  | 0.703  | 0.593 | 0.615 | 0.625 | 0.645 | 0.662  |
| ME for all states            | 0.432 | 0.306 | 0.252 | 0.170 | 0.086 | -0.004 | -0.098 | -0.218 | 0.308 | 0.236 | 0.148 | 0.060 | -0.036 |
| ME only for singlet states   | 0.655 | 0.497 | 0.430 | 0.330 | 0.225 | 0.115  | -0.003 | -0.153 | 0.502 | 0.415 | 0.305 | 0.195 | 0.078  |
| RMSE for all states          | 0.657 | 0.607 | 0.606 | 0.604 | 0.631 | 0.683  | 0.759  | 0.824  | 0.626 | 0.620 | 0.624 | 0.660 | 0.719  |
| RMSE only for singlet states | 0.698 | 0.638 | 0.637 | 0.633 | 0.665 | 0.725  | 0.814  | 0.890  | 0.659 | 0.650 | 0.655 | 0.698 | 0.765  |
| $\mu$ value                  | 0.4   |       |       |       | 0.7   |        |        |        | 1.0   |       |       |       |        |
| $\nu$ value                  | 0.0   | 0.4   | 0.7   | 1.0   | 0.0   | 0.4    | 0.7    | 1.0    | 1.0   |       |       |       |        |
| MAE for all states           | 0.826 | 0.708 | 0.646 | 0.658 | 0.980 | 0.870  | 0.698  | 0.696  | 0.722 |       |       |       |        |
| MAE only for singlet states  | 0.907 | 0.760 | 0.682 | 0.698 | 1.095 | 0.955  | 0.745  | 0.743  | 0.762 |       |       |       |        |
| ME for all states            | 0.626 | 0.508 | 0.342 | 0.038 | 0.772 | 0.658  | 0.494  | 0.224  | 0.382 |       |       |       |        |
| ME only for singlet states   | 0.907 | 0.760 | 0.552 | 0.173 | 1.095 | 0.955  | 0.745  | 0.407  | 0.617 |       |       |       |        |
| RMSE for all states          | 0.853 | 0.745 | 0.693 | 0.700 | 1.030 | 0.902  | 0.788  | 0.733  | 0.841 |       |       |       |        |
| RMSE only for singlet states | 0.920 | 0.794 | 0.733 | 0.742 | 1.122 | 0.974  | 0.844  | 0.779  | 0.898 |       |       |       |        |

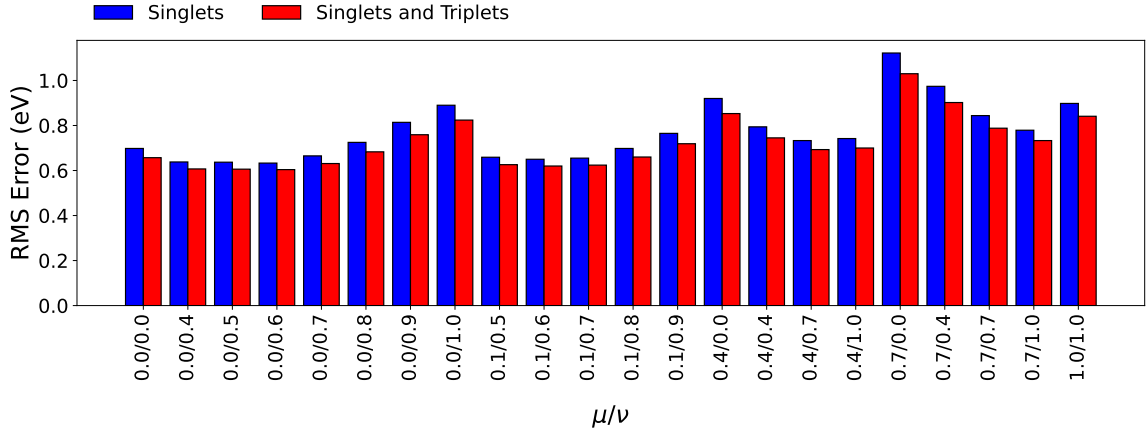

FIG. S14. Root mean squared error (RMSE) for the triazine molecule, considering all states and considering only the singlet states.

TABLE S13. Mean absolute error (MAE), mean error (ME) and root mean squared error (RMSE) for all molecules, considering all states and considering only the singlet states.

| $\mu$ value                  | 0.0   |       |       |       |       |       |       |       | 0.1   |       |       |       |       |
|------------------------------|-------|-------|-------|-------|-------|-------|-------|-------|-------|-------|-------|-------|-------|
| $\nu$ value                  | 0.0   | 0.4   | 0.5   | 0.6   | 0.7   | 0.8   | 0.9   | 1.0   | 0.5   | 0.6   | 0.7   | 0.8   | 0.9   |
| MAE for all states           | 0.470 | 0.457 | 0.463 | 0.474 | 0.484 | 0.494 | 0.502 | 0.517 | 0.464 | 0.472 | 0.482 | 0.491 | 0.501 |
| MAE only for singlet states  | 0.610 | 0.586 | 0.597 | 0.613 | 0.628 | 0.642 | 0.655 | 0.676 | 0.604 | 0.616 | 0.630 | 0.645 | 0.658 |
| ME for all states            | 0.269 | 0.235 | 0.216 | 0.194 | 0.166 | 0.135 | 0.100 | 0.059 | 0.259 | 0.236 | 0.209 | 0.179 | 0.143 |
| ME only for singlet states   | 0.403 | 0.348 | 0.318 | 0.280 | 0.236 | 0.186 | 0.128 | 0.061 | 0.394 | 0.357 | 0.312 | 0.262 | 0.205 |
| RMSE for all states          | 0.606 | 0.592 | 0.590 | 0.593 | 0.600 | 0.614 | 0.636 | 0.665 | 0.598 | 0.569 | 0.597 | 0.606 | 0.621 |
| RMSE only for singlet states | 0.726 | 0.707 | 0.705 | 0.707 | 0.717 | 0.735 | 0.764 | 0.801 | 0.718 | 0.715 | 0.716 | 0.727 | 0.748 |

  

| $\mu$ value                  | 0.4   |       |       |       | 0.7   |       |       |       | 1.0   |
|------------------------------|-------|-------|-------|-------|-------|-------|-------|-------|-------|
| $\nu$ value                  | 0.0   | 0.4   | 0.7   | 1.0   | 0.0   | 0.4   | 0.7   | 1.0   | 1.0   |
| MAE for all states           | 0.561 | 0.525 | 0.497 | 0.520 | 0.665 | 0.630 | 0.570 | 0.561 | 0.644 |
| MAE only for singlet states  | 0.770 | 0.713 | 0.667 | 0.700 | 0.939 | 0.884 | 0.789 | 0.774 | 0.936 |
| ME for all states            | 0.429 | 0.399 | 0.337 | 0.235 | 0.545 | 0.516 | 0.459 | 0.363 | 0.519 |
| ME only for singlet states   | 0.686 | 0.637 | 0.537 | 0.370 | 0.889 | 0.844 | 0.752 | 0.595 | 0.864 |
| RMSE for all states          | 0.719 | 0.691 | 0.664 | 0.656 | 0.869 | 0.840 | 0.800 | 0.762 | 0.937 |
| RMSE only for singlet states | 0.881 | 0.846 | 0.809 | 0.799 | 1.077 | 1.039 | 0.988 | 0.939 | 1.154 |

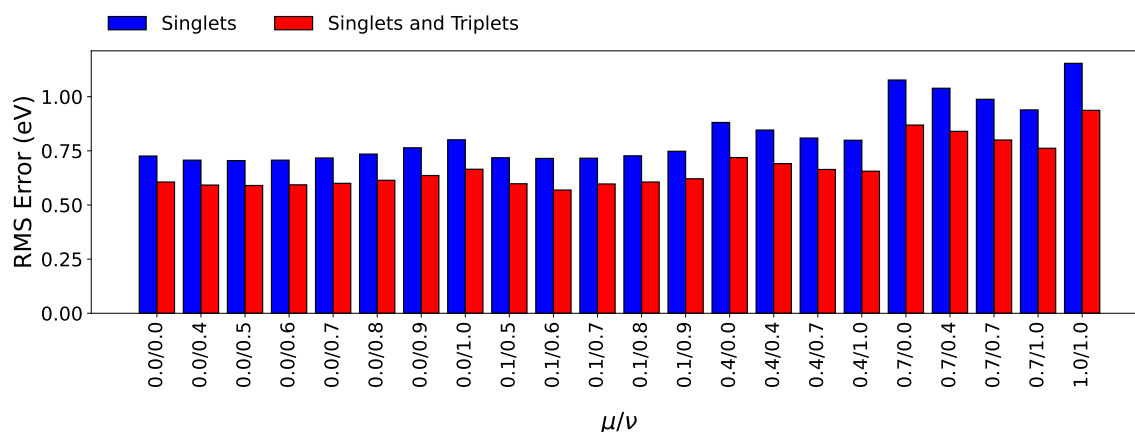

FIG. S15. Root mean squared error (RMSE) for all molecules, considering all states and considering only the singlet states.

TABLE S14. Analysis of the molecular materials test set. Experimental and computed lowest singlet ( $S_1$ ) and triplet ( $T_1$ ) energies, and singlet–triplet gaps ( $\Delta E_{ST}$ ) calculated using SCS-CC2, CAM-B3LYP, SA-CASSCF, and XS-CASSCF methods. All energies are given in eV; CAS spaces and  $\mu$ ,  $\nu$  parameters used in SA-CASSCF and XS-CASSCF are provided.

|           | Exp.      |       |                 | SCS-CC2   |       |                 | CAM-B3LYP |       |                 |
|-----------|-----------|-------|-----------------|-----------|-------|-----------------|-----------|-------|-----------------|
|           | $S_1$     | $T_1$ | $\Delta E_{ST}$ | $S_1$     | $T_1$ | $\Delta E_{ST}$ | $S_1$     | $T_1$ | $\Delta E_{ST}$ |
| DPP       |           |       |                 | 3.720     | 2.140 | 1.580           | 3.565     | 1.206 | 2.359           |
| O5P       |           |       |                 | 3.493     | 1.891 | 1.602           | 3.170     | 0.663 | 2.507           |
| O6P       |           |       |                 | 3.958     | 2.658 | 1.300           | 3.706     | 1.894 | 1.812           |
| pentacene | 1.83      | 0.86  | 0.97            | 2.555     | 1.358 | 1.197           | 2.505     | 1.607 | 1.438           |
| diBN      |           |       |                 | 3.757     | 3.348 | 0.409           | 3.915     | 2.960 | 0.955           |
| mDICz     | 2.80      | 2.30  | 0.50            | 3.152     | 2.812 | 0.339           | 3.332     | 2.380 | 0.952           |
| DikTa     | 2.69      | 2.50  | 0.19            | 3.362     | 3.126 | 0.236           | 3.524     | 2.720 | 0.804           |
| CzBN      | 2.52      | 2.39  | 0.13            | 3.147     | 3.026 | 0.121           | 3.395     | 2.730 | 0.665           |
|           | SA-CASSCF |       |                 | XS-CASSCF |       |                 | CAS       | $\mu$ | $\nu$           |
|           | $S_1$     | $T_1$ | $\Delta E_{ST}$ | $S_1$     | $T_1$ | $\Delta E_{ST}$ |           |       |                 |
| DPP       | 4.971     | 2.161 | 2.809           | 4.045     | 2.208 | 1.838           | (12/10)   | 0     | 0.5             |
| O5P       | 5.080     | 2.073 | 3.007           | 3.870     | 2.096 | 1.774           | (12/10)   | 0     | 0.5             |
| O6P       | 5.199     | 2.562 | 2.637           | 4.254     | 2.584 | 1.670           | (12/10)   | 0     | 0.5             |
| pentacene | 3.583     | 1.599 | 1.984           | 2.632     | 1.597 | 1.035           | (8/8)     | 0     | 1.0             |
| diBN      | 4.681     | 3.849 | 0.833           | 4.334     | 3.815 | 0.519           | (8/8)     | 0     | 0.5             |
| mDICz     | 3.992     | 3.392 | 0.600           | 3.951     | 3.399 | 0.552           | (10/10)   | 0     | 0.5             |
| DikTa     | 4.663     | 3.892 | 0.771           | 4.470     | 4.370 | 0.100           | (8/8)     | 0     | 0.5             |
| CzBN      | 4.268     | 3.751 | 0.518           | 3.900     | 3.812 | 0.089           | (10/10)   | 0     | 1.0             |
